# Supplementary material for: Quantification and Classification of Diclofenac Sodium Content in Dispersed Commercially Available Tablets by Attenuated Total Reflection Infrared Spectroscopy and Multivariate Data Analysis
Source: MDPI journal article supplement (doi:10.3390/ph14050440), 2021-05-07
Supplement: s1 [file s1]

Quantification and classification of diclofenac sodium content in dispersed commercially available tablets by Attenuated Total Reflection Infrared Spectroscopy and Multivariate Data Analysis

*Eirini C. Siozou<sup>a</sup>, Vasilios A. Sakkas<sup>a\*</sup> and Nikolaos Kourkoumelis<sup>b</sup>*

*<sup>a</sup>Laboratory of Analytical Chemistry, Department of Chemistry, University of Ioannina, 45 110 Ioannina, Greece*

*<sup>b</sup>Department of Medical Physics, School of Health Sciences, University of Ioannina, 45 110 Ioannina, Greece*

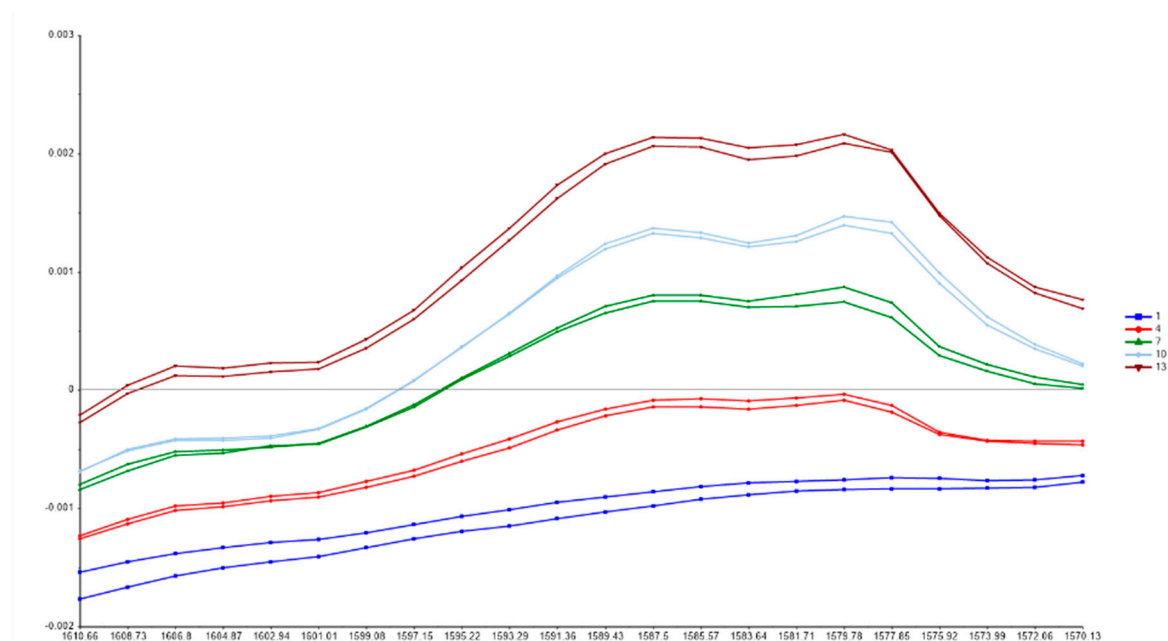

**Figure S1.** The 1600-1500  $\text{cm}^{-1}$  band of the standard solutions, depicting the increase in absorbance as a result of the increase in concentration.

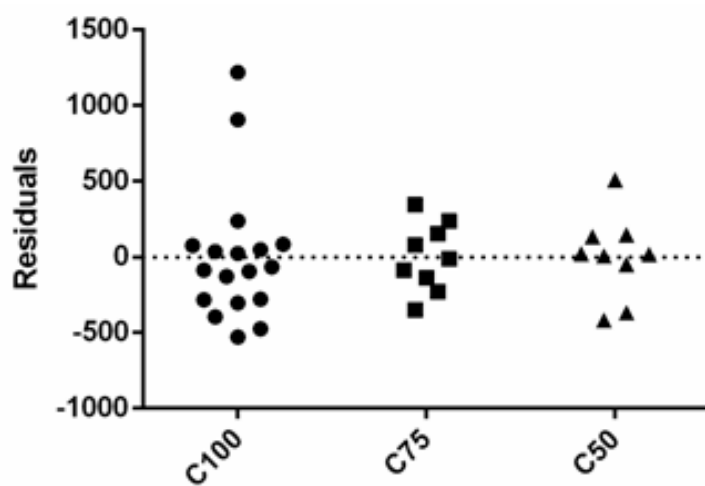

**Figure S2:** Residuals plot of the test set. As the residuals are gathered near zero and have a random pattern, we conclude that the data are fitted in an accurate model, even when the two outliers (in the case of 100 mg tablets) are included.

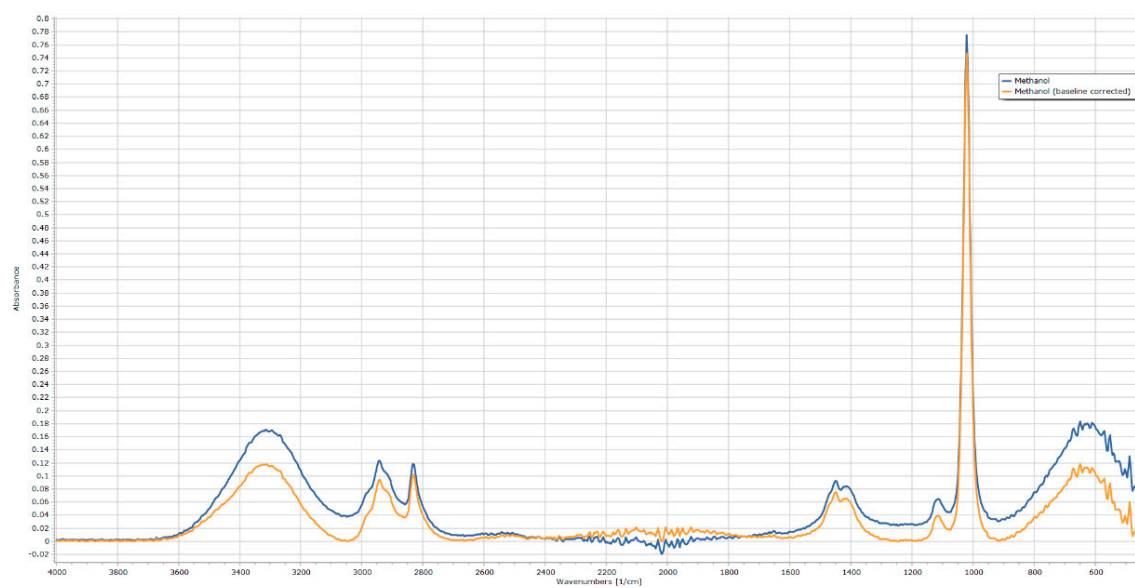

**Figure S3.** FTIR spectrum of pure methanol as measured (blue) and with baseline subtraction. A minor contribution of the solvent exists in the 1600–1500  $\text{cm}^{-1}$  region.

**Table S1:** Predicted concentrations of the known samples' solutions (test set).

|                | REAL SAMPLES  | PREDICTED<br>CONCENTRATIONS OF<br>THE SOLUTIONS (mg/L) | DEVIATION | PREDICTED TABLET<br>CONTENT (mg) |
|----------------|---------------|--------------------------------------------------------|-----------|----------------------------------|
| Tablets 50 mg  | SOLUTION #1-1 | 4831.688                                               | 583.7999  | 48.3 ± 5.8                       |
|                | SOLUTION #1-2 | 4391.424                                               | 547.1805  | 43.9 ± 5.5                       |
|                | SOLUTION #1-3 | 4826.427                                               | 571.7602  | 48.3 ± 5.7                       |
|                | SOLUTION #2-1 | 4943.451                                               | 587.332   | 49.4 ± 5.9                       |
|                | SOLUTION #2-2 | 5319.096                                               | 603.9611  | 53.2 ± 6.0                       |
|                | SOLUTION #2-3 | 4760.168                                               | 651.2797  | 47.6 ± 6.5                       |
|                | SOLUTION #3-1 | 4956.626                                               | 637.6409  | 49.6 ± 6.4                       |
|                | SOLUTION #3-2 | 4816.241                                               | 768.8667  | 48.2 ± 7.7                       |
|                | SOLUTION #3-3 | 4442.204                                               | 635.6401  | 44.4 ± 6.4                       |
| Tablets 75 mg  | SOLUTION #1-1 | 7190.304                                               | 606.1545  | 71.9 ± 6.1                       |
|                | SOLUTION #1-2 | 7439.536                                               | 661.3398  | 74.4 ± 6.6                       |
|                | SOLUTION #1-3 | 7282.211                                               | 496.72    | 72.8 ± 5.0                       |
|                | SOLUTION #2-1 | 7357.887                                               | 548.5912  | 73.6 ± 5.5                       |
|                | SOLUTION #2-2 | 7067.717                                               | 536.5697  | 70.7 ± 5.4                       |
|                | SOLUTION #2-3 | 7116.051                                               | 624.7159  | 71.2 ± 6.2                       |
|                | SOLUTION #3-1 | 6853.65                                                | 792.2275  | 68.5 ± 7.9                       |
|                | SOLUTION #3-2 | 6975.644                                               | 517.4031  | 69.8 ± 5.2                       |
|                | SOLUTION #3-3 | 7547.586                                               | 752.9271  | 75.5 ± 7.5                       |
| Tablets 100 mg | SOLUTION #1-1 | 9276.764                                               | 683.5461  | 92.8 ± 6.8                       |
|                | SOLUTION #1-2 | 10774.98                                               | 890.885   | 107.8 ± 8.9                      |
|                | SOLUTION #1-3 | 9080.44                                                | 657.1057  | 90.8 ± 6.6                       |
|                | SOLUTION #2-1 | 9630.198                                               | 952.634   | 96.3 ± 9.5                       |
|                | SOLUTION #2-2 | 9160.615                                               | 641.7767  | 91.6 ± 6.4                       |
|                | SOLUTION #2-3 | 9792.374                                               | 635.0111  | 97.9 ± 6.4                       |
|                | SOLUTION #3-1 | 9250.944                                               | 593.6955  | 92.5 ± 5.9                       |
|                | SOLUTION #3-2 | 9273.151                                               | 488.0576  | 92.7 ± 4.9                       |
|                | SOLUTION #3-3 | 9459.782                                               | 755.0127  | 94.6 ± 7.6                       |
|                | SOLUTION #4-1 | 9489.07                                                | 742.6256  | 94.9 ± 7.4                       |
|                | SOLUTION #4-2 | 9590.018                                               | 751.2822  | 95.9 ± 7.5                       |
|                | SOLUTION #4-3 | 10461.48                                               | 940.5557  | 104.6 ± 9.4                      |
|                | SOLUTION #5-1 | 9577.55                                                | 738.7823  | 95.8 ± 7.4                       |
|                | SOLUTION #5-2 | 9026.071                                               | 885.2714  | 90.3 ± 8.9                       |
|                | SOLUTION #5-3 | 9639.369                                               | 531.3099  | 96.4 ± 5.3                       |
|                | SOLUTION #6-1 | 9603.998                                               | 648.1289  | 96.0 ± 6.5                       |
|                | SOLUTION #6-2 | 9468.948                                               | 609.9111  | 94.7 ± 6.1                       |

|               |          |          |                |
|---------------|----------|----------|----------------|
| SOLUTION #6-3 | 9426.261 | 731.3464 | $94.3 \pm 7.3$ |
|---------------|----------|----------|----------------|

**Table S2:** ANOVA significance test and data summary

|                                |                                               |                                                 |                                                 |
|--------------------------------|-----------------------------------------------|-------------------------------------------------|-------------------------------------------------|
| Brown-Forsythe ANOVA test      |                                               |                                                 |                                                 |
| F* (DFn, DFd)                  |                                               | 719.5 (2.000, 32.32)                            |                                                 |
| P value                        |                                               | <0.0001                                         |                                                 |
| P value summary                |                                               | ****                                            |                                                 |
| Welch's ANOVA test             |                                               |                                                 |                                                 |
| W (DFn, DFd)                   |                                               | 566.7 (2.000, 20.29)                            |                                                 |
| P value                        |                                               | <0.0001                                         |                                                 |
| P value summary                |                                               | ****                                            |                                                 |
| Data summary                   |                                               |                                                 |                                                 |
| Number of treatments (columns) |                                               | 3                                               |                                                 |
| Number of values (total)       |                                               | 36                                              |                                                 |
|                                | Conc. of solution of<br>100 mg tablets (mg/L) | Conc. of solution of<br>75 mg tablets<br>(mg/L) | Conc. of solution of<br>50 mg tablets<br>(mg/L) |
| Number of values               | 18                                            | 9                                               | 9                                               |
|                                |                                               |                                                 |                                                 |
| Minimum                        | 9026                                          | 6854                                            | 4391                                            |
| 25% Percentile                 | 9268                                          | 7022                                            | 4601                                            |
| Median                         | 9479                                          | 7190                                            | 4826                                            |
| 75% Percentile                 | 9632                                          | 7399                                            | 4950                                            |
| Maximum                        | 10775                                         | 7548                                            | 5319                                            |
|                                |                                               |                                                 |                                                 |
| Mean                           | 9555                                          | 7203                                            | 4810                                            |
| Std. Deviation                 | 442.6                                         | 224.9                                           | 276.6                                           |
| Std. Error of<br>Mean          | 104.3                                         | 74.97                                           | 92.21                                           |
|                                |                                               |                                                 |                                                 |
| Lower 95% CI                   | 9334                                          | 7031                                            | 4597                                            |
| Upper 95% CI                   | 9775                                          | 7376                                            | 5022                                            |

**Table S3:** UV calibration curve data.

|                            |   |                        |
|----------------------------|---|------------------------|
| $\lambda_{\text{max}}$     | : | 280 nm                 |
| Calibration curve equation | : | $y = 0.0777x + 0.0282$ |
| Correlation coefficient    | : | $R^2 = 0.9993$         |
| Concentration range        | : | 5 – 15 ppm             |
| $S_a$                      | : | 0.001194               |
| $S_b$                      | : | 0.01261                |
| $S_{y/x}$                  | : | 0.00909                |

**Table S4:** Results of known samples by UV/Vis spectrophotometry.

| REAL<br>SAMPLE | ABSORBANCE | ESTIMATED<br>VALUE (mg) | DECLARED<br>VALUE<br>(mg) |
|----------------|------------|-------------------------|---------------------------|
| #50-1          | 0.798      | 49.54                   | 50                        |
| #50-2          | 0.786      | 48.76                   | 50                        |
| #50-3          | 0.799      | 49.63                   | 50                        |
| #75-1          | 0.802      | 74.75                   | 75                        |
| #75-2          | 0.790      | 73.56                   | 75                        |
| #75-3          | 0.801      | 74.55                   | 75                        |
| #100-1         | 0.797      | 98.90                   | 100                       |
| #100-2         | 0.787      | 97.68                   | 100                       |
| #100-3         | 0.804      | 99.80                   | 100                       |
